1 **Characteristics and needs of Vietnamese technical intern trainees (care workers) in**

2 **Japan: A qualitative study**

3

4 *Short title: Vietnamese technical intern trainees in Japan*

5

6 Koji Hara<sup>1\*</sup>, Tomokazu Yamamura<sup>1,2</sup>, Li Ningyi<sup>1</sup>, Pham Thu Huong<sup>3</sup>

7

8 <sup>1</sup> School of Economics and Business Administration, Yokohama City University, Yokohama,

9 Japan

10 <sup>2</sup> Aijinkai Healthcare Corporation, Osaka, Japan

11 <sup>3</sup> The Collaboration Center for Japanese Language & Culture, Hanoi University, Hanoi,

12 Vietnam

13

14 \* Corresponding author

15 E-mail: [hara.koj.vv@yokohama-cu.ac.jp](mailto:hara.koj.vv@yokohama-cu.ac.jp) (KH)

## 16 **Abstract**

## 17 **Background**

18 Foreign caregivers are assuming increasing importance in Japan due to a significant shortage  
19 of caregivers. To secure and train stable human resources, it is important to understand the  
20 needs and challenges of foreign caregivers.

## 21 **Objective**

22 To identify the needs and challenges of Vietnamese technical interns, the largest group of  
23 foreign caregivers in Japan, to facilitate system reforms for foreign caregivers and a more  
24 efficient recruitment process.

## 25 **Methods**

26 A semi-structured interview survey was conducted with 27 Vietnamese technical interns  
27 (caregivers). Interview items included reasons for choosing technical internship in Japan,  
28 desired length of stay, and expectations in Japan, as well as career advancement after returning  
29 home. Descriptive statistics and k-means clustering were used to analyze the data.

## 30 **Results**

31 Survey results showed that all respondents had made their own decision to come to Japan and  
32 wanted to pursue caregiver certification; 44% had also considered other countries apart from  
33 Japan; most wanted to stay in Japan for as long as possible; 37% wanted to live in Japan  
34 permanently. The k-means method revealed three clusters: Japanophile cluster or those who

35 preferred Japan for its landscape, culture, and national character; Word-of-mouth cluster or  
36 those influenced by personal referrals; and Intellectual cluster or those influenced by Japan's  
37 economic development and care levels.

## 38 **Conclusions**

39 Vietnamese technical interns hoped to study advanced Japanese, become certified care workers,  
40 and work in the nursing field after returning to their home country. They also tended to want  
41 to stay in Japan for a longer period than that assumed for technical internship programs. Our  
42 findings indicate that support for obtaining qualifications, Japanese language skills, and  
43 caregiving skills are important to secure stable foreign caregivers. Since each cluster had  
44 different backgrounds and reasons, motives, and assumptions for coming to Japan, it is  
45 necessary to tailor recruitment, training, and support for each cluster.

## 46 **Introduction**

47           Japan's declining birthrate and aging population are increasing the demand for long-  
48 term care; however, there is an acute shortage of care workers to support this demand.  
49 According to the Ministry of Health, Labor and Welfare, there were 1.9 million care workers  
50 in Japan in 2016, and it is estimated that approximately 2.45 million will be needed by 2045  
51 [1]. The number of care workers has increased by only 15,000 annually, and there are concerns  
52 that the workforce will decrease because of the declining birthrate [2]. To address the shortage  
53 of care workers, not only do the domestic human resources need to be secured by improving  
54 the working conditions and wages of care workers, but the acceptance of foreign care workers  
55 also needs to be addressed. In addition new technologies such as information and  
56 communication technology and robots need to be utilized [3]. Employment of foreign care  
57 workers has been expanding in Japan; according to a survey, 30% of the long-term care  
58 facilities in Japan are staffed by foreign care workers [4].

59           Acceptance of foreign caregivers in Japan may be categorized into the following four  
60 types: (1) the Economic Partnership Agreement (the purpose of which is to strengthen bilateral  
61 economic partnerships), (2) the status of residence for nursing care (the purpose of which is the  
62 acceptance of foreigners in professional and technical fields), (3) the Technical Intern Training  
63 Program (the purpose of which is the transfer of skills to their home country), and (4) the  
64 Specified Skilled Worker (the purpose of which is the acceptance of foreigners with certain

65 expertise and skills to address labor shortage) [5, 6]. Of the four programs, the Technical Intern  
66 Training Program comprises the largest number of foreign caregivers at 7,900, with Vietnam  
67 accounting for approximately 40% of the total. However, several challenges have been  
68 identified in recruiting foreign caregivers. For example, Yu [7] pointed out that recruitment,  
69 training, and traveling costs are incurred as acceptance costs and that a certain level of Japanese  
70 language proficiency is required. In addition, they are affected by exchange rates and  
71 competition with other countries for human resources [7]. According to the Japan External  
72 Trade Organization, the total number of general workers sent abroad from Vietnam is 140,000,  
73 with Japan and Taiwan receiving a similar proportion of these workers (approximately 40%),  
74 and South Korea (approximately 7%) also growing in popularity as a destination for these  
75 workers [8].

76 Several studies have been conducted on Vietnamese technical trainees coming to  
77 Japan [9-12]. However, few studies have focused on their needs, thoughts, and concerns. This  
78 information may be useful from the perspective of system reform and human resource  
79 recruitment. Therefore, this study conducted an interview survey of Vietnamese technical  
80 interns (nurses) prior to their arrival in Japan, regarding their reasons for coming to Japan, their  
81 thoughts and concerns about Japan, and their careers after returning home.

82

## 83 **Materials and Methods**

## 84 **Participant selection and data collection**

85            Technical intern trainees are expected to come to Japan after receiving Japanese  
86 language and technical training for several months at the sending agency in Vietnam. Since the  
87 regions and characteristics of the participants from each sending agency may be different, this  
88 survey was conducted with recruits from three different sending agencies in Hanoi, Vietnam.

89            The survey was conducted between November 2023 and February 2024 after ethical  
90 approval was obtained from the Yokohama City University Ethics Committee (reference  
91 number: 2023-18). Participants were sent an explanation of the survey and the survey items in  
92 advance. Participants then submitted consent forms to participate.

93            Semi-structured interviews were conducted with 27 Vietnamese nationals affiliated  
94 with Vietnamese sending agencies (nine each from three sending agencies) and scheduled to  
95 come to Japan as technical intern trainees (nursing care). Participants were divided into groups  
96 of three, for a total of nine groups, and each group was interviewed for approximately 90  
97 minutes by the authors. The interviews were conducted in the conference room of each sending  
98 agency, with the assistance of a Vietnamese interpreter. Questions were asked in Japanese and  
99 answered in Vietnamese. The survey items are listed in S1 Appendix.

100

## 101 **Data analysis**

102            Descriptive statistics were calculated based on the data obtained from the semi-

103 structured interviews. Clustering using the k-means method with cosine similarity was  
104 performed on the 27 participants, who were classified into several clusters. The elbow method  
105 was used to determine the number of clusters. The variables used for clustering were selected  
106 based on the importance and variance of items. All statistical analyses were performed in R  
107 (ver. 4.2.3).

108

## 109 **Results**

110 Participant characteristics are summarized in Table 1. Most participants were female  
111 (92.6%). Participants' average age was 21.7 years, and about half of them (55.6%) were high  
112 school graduates, while 22.2% had children. There was no variation in sex or age among the  
113 sending agencies, but there was a variation in education and presence of children.

114 **Table 1. Participants' Characteristics.**

|                        |                               | <b>Overall</b>    | <b>A</b>          | <b>B</b>        | <b>C</b>          |
|------------------------|-------------------------------|-------------------|-------------------|-----------------|-------------------|
| Sex                    | Female                        | 25 (92.6%)        | 9 (100%)          | 8 (88.9%)       | 8 (88.9%)         |
|                        | Male                          | 2 (7.4%)          | 0 (0%)            | 1 (11.1%)       | 1 (11.1%)         |
| Age                    |                               | 21.7 ( $\pm$ 4.5) | 22.7 ( $\pm$ 4.7) | 19.8 ( $\pm$ 4) | 22.3 ( $\pm$ 4.9) |
| Educational background | High school                   | 15 (55.6%)        | 4 (44.4%)         | 9 (100%)        | 2 (22.2%)         |
|                        | Professional training college | 4 (14.8%)         | 1 (11.1%)         | 0 (0%)          | 3 (33.3%)         |
|                        | University                    | 8 (29.6%)         | 4 (44.4%)         | 0 (0%)          | 4 (44.4%)         |
| Having children        | Yes                           | 6 (22.2%)         | 3 (33.3%)         | 2 (22.2%)       | 1 (11.1%)         |
|                        | No                            | 21 (77.8%)        | 6 (66.7%)         | 7 (77.8%)       | 8 (88.9%)         |

115 A, B, and C represent the three sending agencies.

116 Table 2 shows the interview survey results. More than half the participants (56%) did  
117 not consider any other country apart from Japan. Potential destinations other than Japan  
118 included Germany (7 respondents), Taiwan (3), Korea (3), and China (1). The reasons for  
119 choosing Japan over Germany were the better impression participants had of Japan, the friendly  
120 relations between Japan and Vietnam, and the greater availability of information on Japan than  
121 on Germany. Taiwan was chosen because of its cultural and lifestyle similarities with Japan.  
122 Japan remained the first choice, based on information available on the Internet, and that from  
123 acquaintances and relatives in Japan. Korea was less popular because it does not offer nursing  
124 care as a career.

125 **Table 2. Descriptive Statistics of the Interview Results.**

| Questions                                                      | Options         | n / Average | Percentage / SD |
|----------------------------------------------------------------|-----------------|-------------|-----------------|
| 1. Whose decision was it to go to Japan?                       | Self-determined | 27          | 100%            |
|                                                                | Other           | 0           | 0%              |
| 2. Initially, was your family in favor of your going to Japan? | Yes             | 20          | 74%             |
|                                                                | No              | 7           | 26%             |
| 3. Did you also consider countries other than Japan?           | Yes             | 12          | 44%             |
|                                                                | Germany         | 7           | 26%             |
|                                                                | Taiwan          | 3           | 11%             |
|                                                                | Korea           | 3           | 11%             |
|                                                                | China           | 1           | 4%              |
|                                                                | No              | 15          | 56%             |
| 4. What are your goals in Japan?                               | JLPT: N2        | 19          | 70%             |



|                                                 |                          |           |             |
|-------------------------------------------------|--------------------------|-----------|-------------|
|                                                 | JLPT: N1                 | 6         | 22%         |
|                                                 | Certified Care Worker    | 27        | 100%        |
| 5. What are your concerns in Japan?             | Communication            | 17        | 63%         |
|                                                 | Living environment/train | 8         | 30%         |
|                                                 | Climate (cold)           | 5         | 19%         |
|                                                 | Disaster                 | 3         | 11%         |
| 6. Do you want to live in Japan permanently?    | Yes                      | 10        | 37%         |
|                                                 | No/Undecided             | 17        | 63%         |
| 7. What is your desired length of stay?         |                          | 6.8 years | ± 3.1 years |
| 8. What do you want to do when you return home? | Care worker              | 18        | 67%         |
|                                                 | Caregiver Teacher        | 5         | 19%         |
|                                                 | Other                    | 4         | 15%         |
| 9. How much is your take-home pay in Japan?     |                          | \$1,038.9 | ± \$31.5    |
| 10. What is your desired take-home pay?         |                          | \$1,197.3 | ± \$122.9   |

126 JLPT, Japanese-Language Proficiency Test. This test has five levels, from N5 to N1, with N1  
 127 being the most difficult, and measures the level at which one can understand the Japanese being  
 128 used in a wide range of situations.

129 Certified care workers are certified nationally in Japan.

130 \$1 = 149 yen

131 Regarding their career goals, 22% of the respondents wanted to pass the most difficult  
 132 level (N1) of the Japanese-Language Proficiency Test, while all of them wanted to become  
 133 certified care workers. However, communication difficulties, living environment such as

134 travelling by train, cold weather, and natural disasters, were cited as areas of concern regarding  
135 Japan. Only one in three respondents wished to stay in Japan permanently; others wanted to  
136 stay for an average of 6.8 years. Many hoped to work in the nursing care industry after returning  
137 to their home country.

138 The reasons for choosing Japan are illustrated in Fig 1. Approximately half of the  
139 respondents (51.9%) chose Japan because of their interest in Japanese culture (e.g., anime and  
140 kimonos) and scenic beauty (e.g., Mt. Fuji). Approximately 40% of the respondents cited  
141 personal recommendation by family and friends and the diligence and rule-abiding nature of  
142 Japanese people, respectively, as the reasons for their choice.

143 **Fig 1. Reasons for Choosing Japan.**

144 The number of clusters was determined to be three using the elbow method. The  
145 results of clustering using the k-means method are shown in Fig 2 and Table 3. The three  
146 clusters were (1) the Japanophile cluster, (2) the word-of-mouth cluster, and (3) the intellectual  
147 cluster.

148 **Fig 2. Results of Clustering Using the K-Means Method.** Components 1 and 2 explain  
149 38.15% of the point variability.

150 **Table 3. Characteristics of the Three Clusters Using the K-Means Method.**

| Cluster name                                                                 | Japanophile                                                                                      | Word-of-mouth                                                                                   | Intellectual                                                                                    |
|------------------------------------------------------------------------------|--------------------------------------------------------------------------------------------------|-------------------------------------------------------------------------------------------------|-------------------------------------------------------------------------------------------------|
| n                                                                            | 10                                                                                               | 9                                                                                               | 8                                                                                               |
| Educational background                                                       | High school (70.0%)<br>Professional training college (30.0%)<br>University (0%)                  | High school (55.6%)<br>Professional training college (33.3%)<br>University (11.1%)              | High school (37.5%)<br>Professional training college (12.5%)<br>University (50%)                |
| Having children                                                              | Yes (10.0%)/No (90.0%)                                                                           | Yes (62.5%)/No (37.5%)                                                                          | Yes (0%)/No (100%)                                                                              |
| Main reasons for choosing the technical internship system and sending agency | On-Campus Briefing (80.0%)<br>Referrals by family and friends (30.0%)<br>Internet search (40.0%) | On-Campus Briefing (0.0%)<br>Referrals by family and friends (88.9%)<br>Internet search (33.3%) | On-Campus Briefing (75.0%)<br>Referrals by family and friends (0.0%)<br>Internet search (40.0%) |
| Main reasons for choosing Japan                                              | Landscape & Culture (80.0%)<br>Economic development (70.0%)<br>National character (70.0%)        | Referrals by family and friends (66.7%)<br>High level of care (66.7%)                           | Landscape & Culture (62.5%)<br>Vietnam–Japan friendship (50.0%)                                 |
| Other options for countries                                                  | Yes (10.0%, Taiwan)<br>No (90.0%)                                                                | Yes (55.6%, Taiwan, Korea, China)<br>No (44.4%)                                                 | Yes (75.0%, Germany)<br>No (25.0%)                                                              |
| Desire for permanently living in Japan                                       | Yes (10.0%) / No (90.0%)                                                                         | Yes (33.3%) /No (66.7%)                                                                         | Yes (75.0%) / No (25.0%)                                                                        |
| Willingness to take JLPT N1                                                  | Yes (10.0%) /No (90.0%)                                                                          | Yes (0%) /No (100.0%)                                                                           | High (62.5%) /No (37.5%)                                                                        |

151 The numbers in parentheses indicate the percentage of respondents in the cluster who gave the associated response.

152 JLPT, Japanese Language Proficiency Test.

## 153 Discussion

154 According to the General Statistics Office of Vietnam, the Vietnamese population  
155 aged 65 and above will have grown rapidly, from 7.4 million people in 2019 (7.7% of the  
156 population) to 16.8 million people by 2039, and 25.2 million people by 2069 (21.5%) [13].  
157 However, Vietnam has no long-term care insurance and only a few long-term care services.  
158 Therefore, family members play an important role in caring for older adults. In recent years,  
159 family care has been challenged by declining family sizes due to declining birth rates, a shift  
160 from multi-generational cohabitation to nuclear families with an increasing proportion of  
161 elderly couples living alone, and rapid urbanization with a large number of rural youths  
162 migrating to urban areas, resulting in rapid family dispersal [14]. Consequently, the  
163 respondents wanted to gain skills in Japan in anticipation of future care needs or to provide  
164 care to their families.

165 All respondents indicated that they wanted to become certified care workers, which is  
166 a Japanese national qualification that effectively allows for permanent residence. However,  
167 obtaining this certificate is difficult, with a pass rate of 82.8% for all candidates compared to  
168 43.8% for foreign candidates, under the Economic Partnership Agreement [15]. Although  
169 exam-related accommodations have been made for foreign examinees (e.g., paraphrasing of  
170 difficult expressions, English notation of diseases, and extended exam times), the learning  
171 environment and exam preparation support must be improved. One report also found that

172 gaining a caregiver qualification led to greater understanding of and confidence in their work  
173 and contributed to the professionalization of care [16].

174 In this study, the participants were classified into three clusters. They were divided  
175 based on their educational background, reasons for choosing Japan over other candidate  
176 countries, and desire for permanent residence. The characteristics of each cluster were then  
177 identified. These clusters can be useful for securing and developing human resources in the  
178 future. For example, if one wants to target people who wish to live permanently in Japan,  
179 targeting the intellectual cluster may be effective for disseminating information via the Internet  
180 and emphasizing learning and growth opportunities in Japan. However, when targeting the  
181 relatively young age group of high school graduates, it may be prudent to target the Japanophile  
182 cluster by visiting high schools to disseminate information emphasizing culture, such as anime  
183 and manga, or the diligent and rule-abiding nature of the Japanese people. In addition, when  
184 targeting people with high aspirations for caregiving skills, targeting the word-of-mouth cluster  
185 may be important by creating a mechanism that fosters referrals for Japanese caregiving.  
186 Cluster-based targeting, public relations strategies, and cultivation methods must be given  
187 greater consideration while targeting specific care workers.

188 Japan's technical internship system is at a major turning point. It has been  
189 recommended that the system be revised to protect the human rights of trainees, clarify career  
190 advancements, and create a safe, secure, and harmonious society for foreigners [17]. In fact,

191 much research has pointed out problems with the content of work, the treatment of trainees,  
192 and the living conditions of technical interns in Japan [11, 18-20]. Many participants in this  
193 study were influenced by personal recommendations, particularly regarding the working  
194 environment and life in the community. Therefore, promptly establishing a system and  
195 providing better working and living environments are among the most important efforts for  
196 attracting foreign caregivers.

197 This study has some limitations that must be considered. First, the participants were  
198 limited to 27 individuals from sending agencies in Hanoi; hence, these findings cannot be  
199 generalized to all Vietnamese or technical interns. However, by targeting three sending  
200 agencies, we avoided significant biases. Second, the participants were interviewed prior to their  
201 entry into Japan, and their opinions may change after spending some time in Japan, whereby  
202 they may experience a culture shock, conflicting reality or information regarding their  
203 assumptions, or a change in their goals and plans; these aspects would need further  
204 investigation.

205

## 206 **Conclusions**

207 Our study revealed that Vietnamese technical (nursing) trainees going to Japan wanted  
208 to gain advanced Japanese language proficiency and become certified care workers. Most  
209 wanted to continue working in the nursing industry after returning to Vietnam. Additionally,

210 more than half the participants chose Japan for care work compared to other countries such as  
211 Germany, Taiwan, and Korea, particularly because of Japan’s landscape, culture, and national  
212 character, as well as positive referrals by family and friends. More than a quarter of the  
213 participants were looking to live in Japan permanently. Given the findings of the clustering of  
214 our data, it is important to consider information dissemination, communication, and human  
215 resource development tailored to the characteristics of each cluster in order to recruit  
216 effectively.



## 217 **References**

- 218 1. Ministry of Health, Labor and Welfare. Treatment improvement of care workers (in  
219 Japanese). 2018 [cited 20 Feb 2024]. Available from:  
220 <https://www.mhlw.go.jp/content/12601000/000376603.pdf>
- 221 2. Ministry of Health, Labor and Welfare. Number of care workers (in Japanese). 2023  
222 [cited 20 Feb 2024]. Available from:  
223 <https://www.mhlw.go.jp/content/12000000/001211181.pdf>
- 224 3. Okamoto S, Komamura K. Towards universal health coverage in the context of  
225 population ageing: A narrative review on the implications from the long-term care  
226 system in Japan. *Arch Public Health*. 2022;80:210. doi: 10.1186/s13690-022-00970-8
- 227 4. Japanese Council of Senior Citizens Welfare Service. Questionnaire survey on foreign  
228 care workers (in Japanese). Available from:  
229 <https://www.roushikyo.or.jp.e.akc.hp.transer.com>
- 230 5. Ministry of Health, Labor and Welfare. Structure of acceptance of foreign care workers  
231 (in Japanese). Available from:  
232 <https://www.mhlw.go.jp/content/12000000/000994004.pdf>
- 233 6. Long NDB, Le Van NT, Lan NDQ, Tran HLL. Human resources development for  
234 supporting industries through technical intern trainee dispatch programe of JITCO. *Int*  
235 *J Arts Sci*. 2017;10:211–21

- 236 7. Yu Y. Issues and the expansion of policies on accepting foreign care workers into Japan  
237 (in Japanese). *Josei Gendai Seisaku Kenkyu*. 2020;13:1–17
- 238 8. Japan External Trade Organization. Overseas worker dispatch in 2022, with the largest  
239 number of workers to Japan, approximately 70,000 (in Japanese). 2023 [cited 20 Feb  
240 2024]. Available from:  
241 <https://www.jetro.go.jp/biznews/2023/03/f1e9f94588c66a7a.html>
- 242 9. Bélanger D, Ueno K, Hong KT, Ochiai E. From foreign trainees to unauthorized  
243 workers: Vietnamese migrant workers in Japan. *Asian Pac Migr J*. 2011;20:31–53. doi:  
244 10.1177/011719681102000102
- 245 10. Shinohara A, Kawasaki R, Kuwano N, Ohnishi M. Interview survey of physical and  
246 mental changes and coping strategies among 13 Vietnamese female technical interns  
247 living in Japan. *Health Care Women Int*. 2024;45:265–81. doi:  
248 10.1080/07399332.2021.1963966
- 249 11. Siu K, Koo A. Temporary labor migration and skill transfer in Japan: Migration  
250 experiences and outcomes of technical intern trainees from Vietnam and China. *J Soc*  
251 *Issues*. 2022;78:606–26. doi: 10.1111/josi.12468
- 252 12. Muranaka A. Beyond blue ocean? The roles of intermediaries in the cross-border labour  
253 market between Japan and Vietnam. *Glob Netw*. 2022;22:514–29. doi:  
254 10.1111/glob.12356

- 255 13. General Statistics Office. Population projections for Vietnam; 2019–2069. 2020 [cited  
256 20 Feb 2024]. Available from: [https://vietnam.unfpa.org/sites/default/files/pub-](https://vietnam.unfpa.org/sites/default/files/pub-pdf/final_population_projection_eng_upload_9_august_2021.pdf)  
257 [pdf/final\\_population\\_projection\\_eng\\_upload\\_9\\_august\\_2021.pdf](https://vietnam.unfpa.org/sites/default/files/pub-pdf/final_population_projection_eng_upload_9_august_2021.pdf)
- 258 14. Giang LT, Nguyen NT, Pham TTH, Phi PM. Factors associated with receipt of informal  
259 care among the Vietnamese older persons: Evidence from a national survey. *Front*  
260 *Public Health*. 2023;11:1065851. doi: 10.3389/fpubh.2023.1065851
- 261 15. Ministry of Health, Labor and Welfare. Results of the 36th National Examination for  
262 EPA Care Worker Candidates (in Japanese). Available from:  
263 <https://www.mhlw.go.jp/content/12004000/001231503.pdf>
- 264 16. Japan Association of Certified Care Workers. Report on a survey and research project  
265 to understand the current status of “caregiving” residents and support their activities  
266 2023 (in Japanese). Available from: <https://www.jaccw.or.jp/kokusai-hokoku.pdf>
- 267 17. Japan External Trade Organization. The government’s response to the final report  
268 (plan) (as of February 8, 2024) \*JITCO tentative translation. Available from:  
269 <https://www.jitco.or.jp/en/news/article/1512/>
- 270 18. Yamashita T, Quy PN, Yamada C, Nogami E, Seto-Suh E, Iwamoto S, et al. A cross-  
271 sectional survey of material deprivation and suicide-related ideation among Vietnamese  
272 technical interns in Japan. *Front Psychol*. 2023;14:1241837. doi:  
273 10.3389/fpsyg.2023.1241837

- 274 19. Tran BQ. Vietnamese technical trainees in Japan voice concerns amidst COVID-19.  
275 The Asia Pac J. 2020;18:11.
- 276 20. Chonlaworn P. Cheap and dispensable: Foreign labor in Japan via the technical intern  
277 training program. jsn Journal. 2021;11:33–49. doi: 10.14456/jsnjournal.2021.3

278 **Supporting information**

279 **S1 Appendix. Interview Items.**

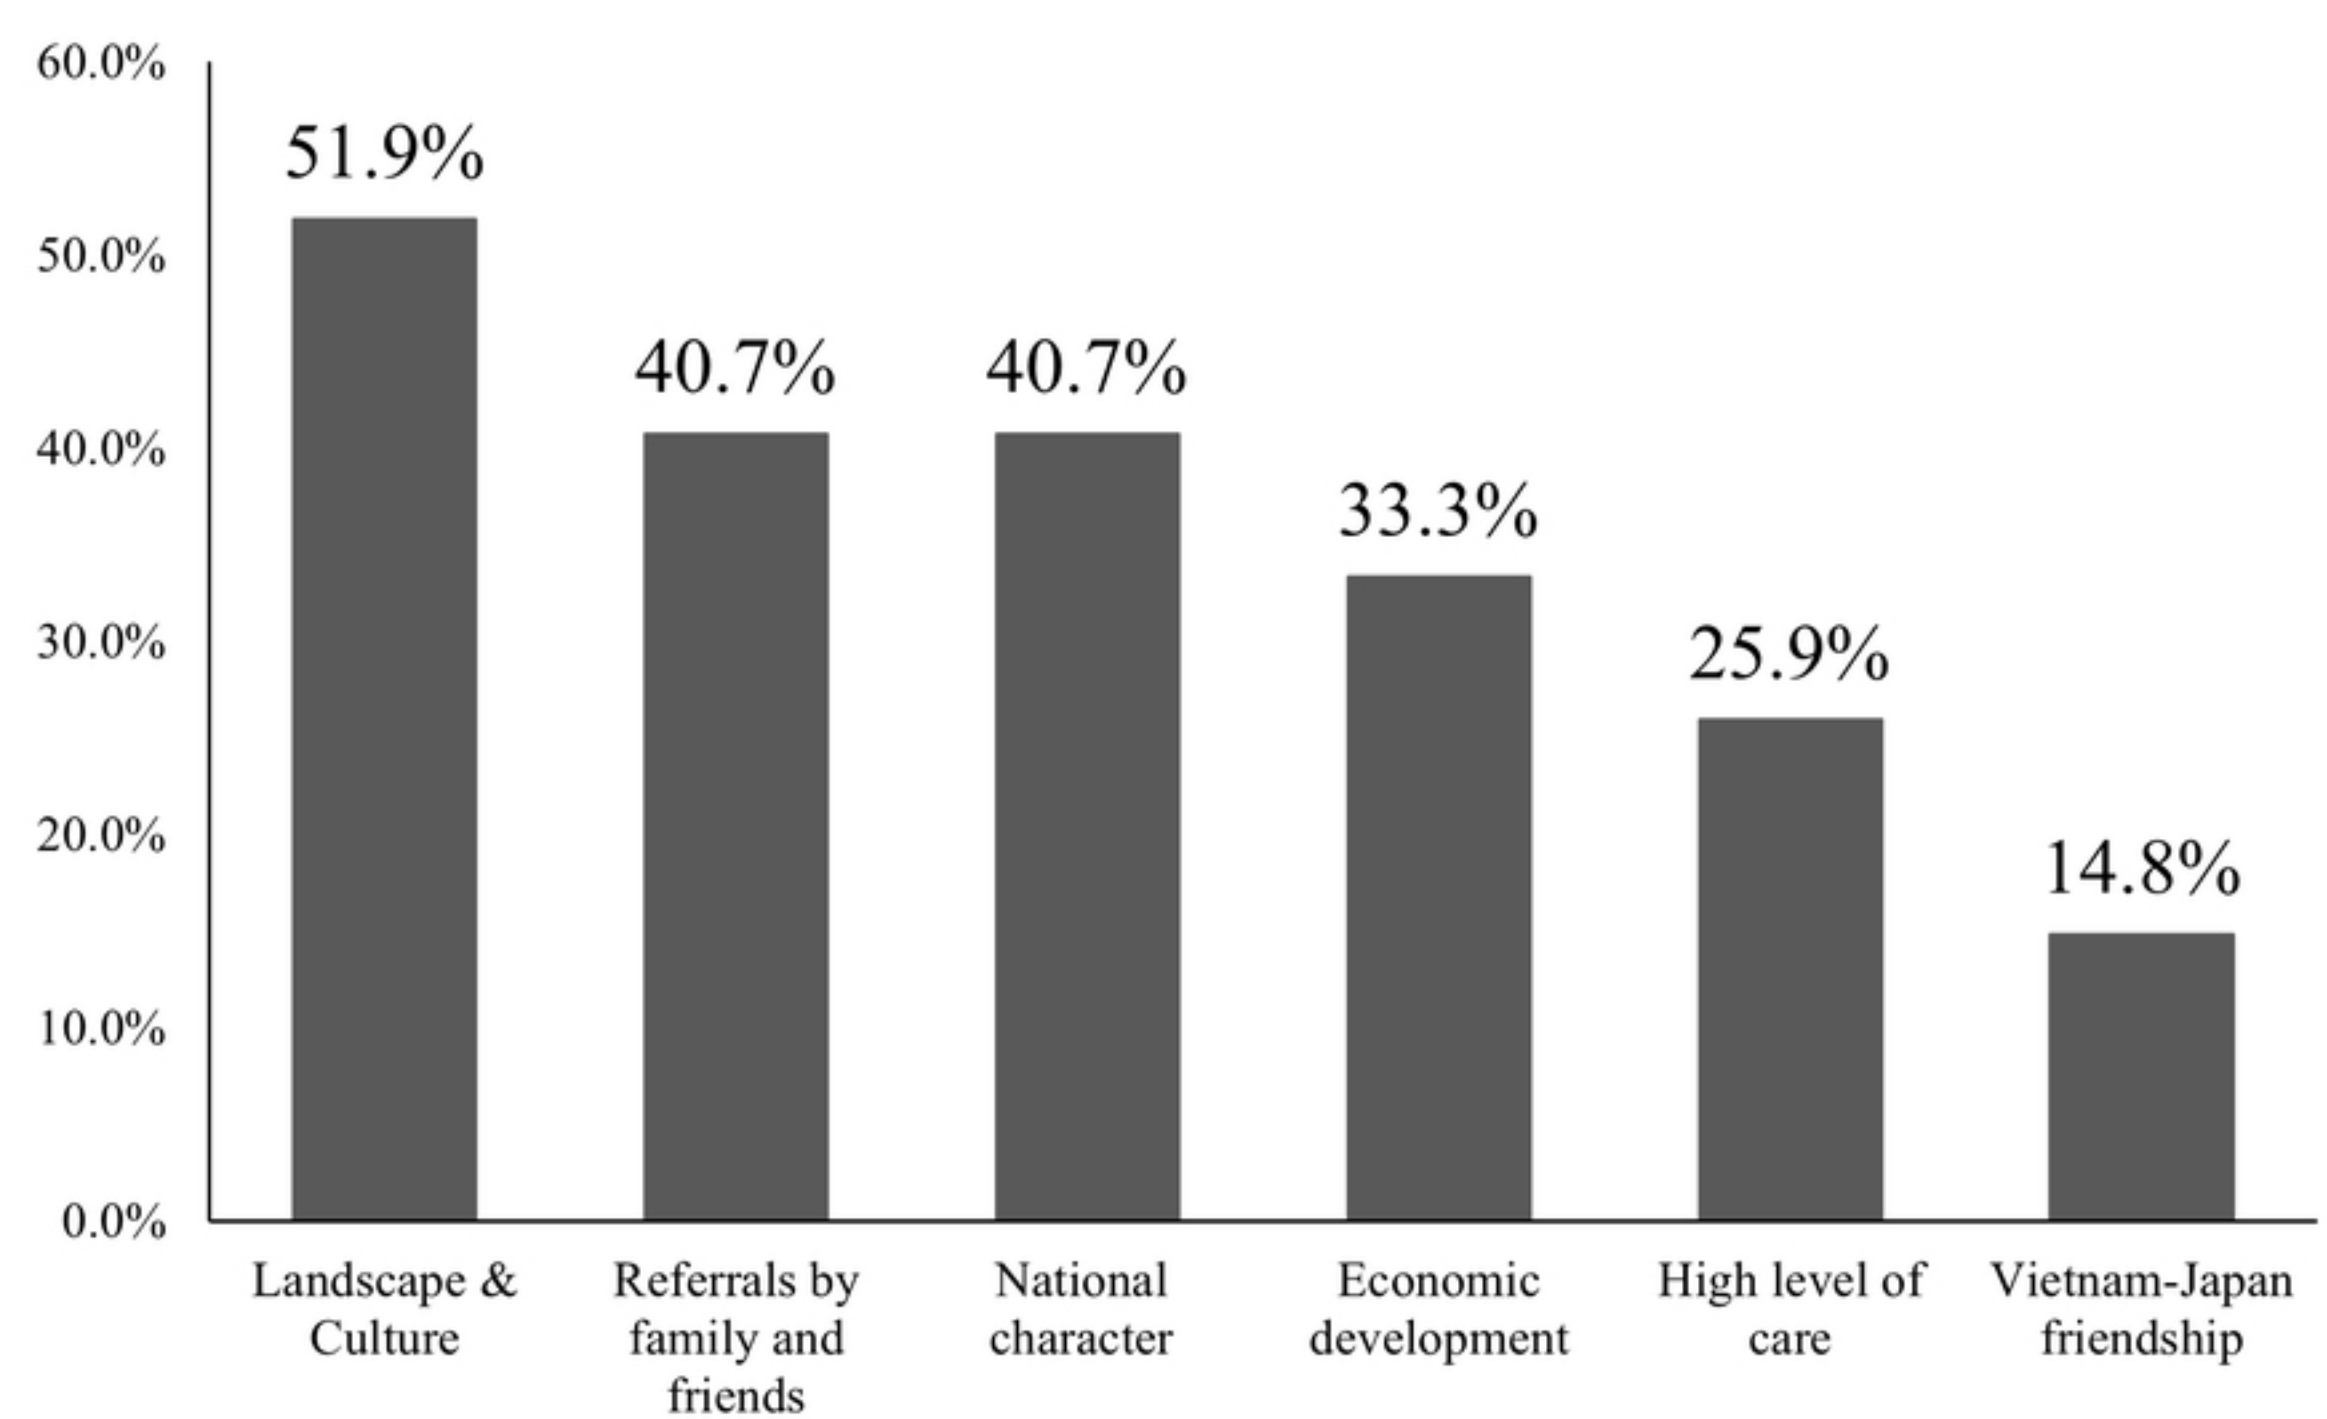

Figure1

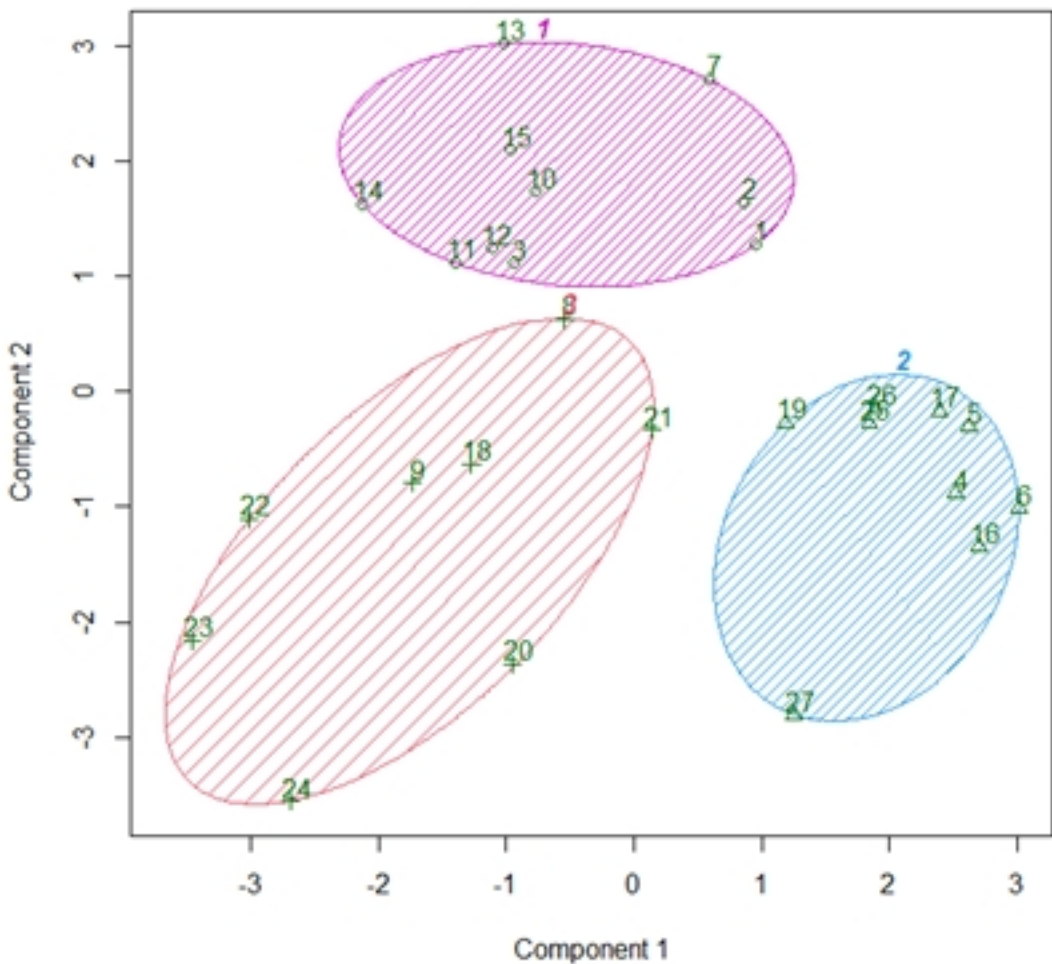

Figure2
